# Supplementary material for: Structurally modified carbon nanotubes as twisted fibers towards electrochemical detection of environmentally hazardous cartap
Source: Royal Society of Chemistry journal article supplement (doi:10.1039/d5ay00087d), 2025-01-01
Supplement: d5ay00087d1.pdf [file d5ay00087d1.pdf]

## Supporting information

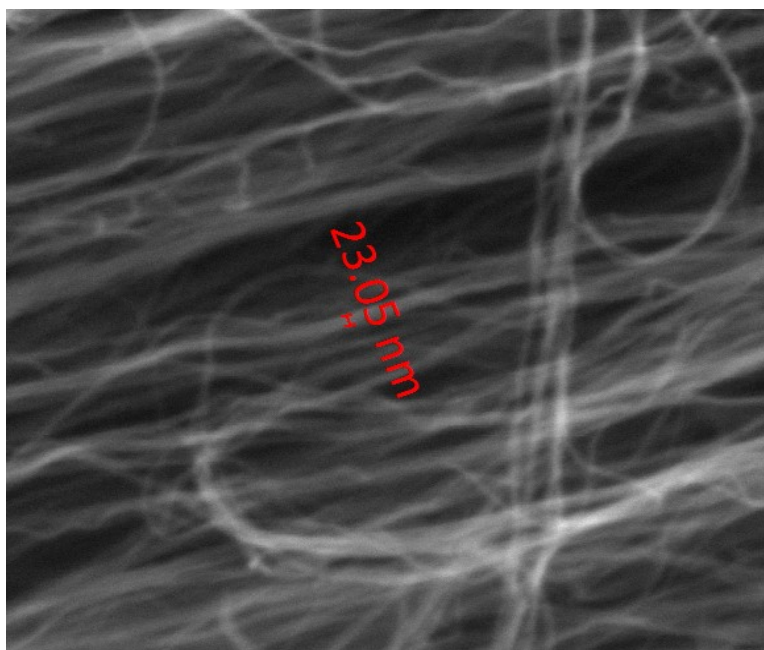

**Fig. S1.** SEM images for the CNTs fiber.

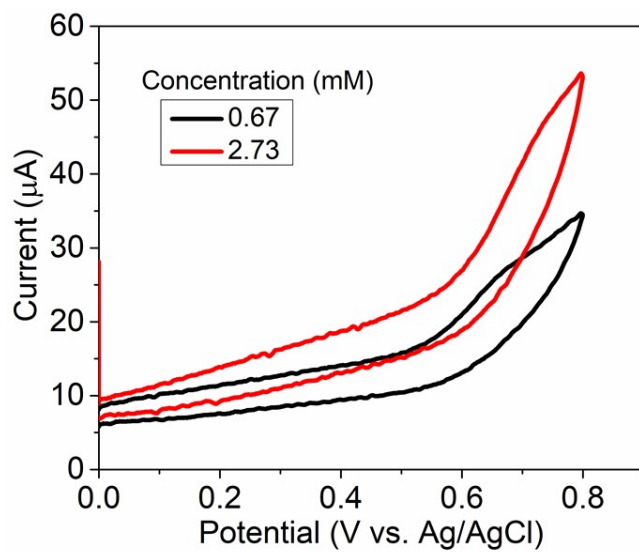

**Fig. S2.** Cyclic voltammograms for the lower and higher concentration of cartab at CNTs fiber.

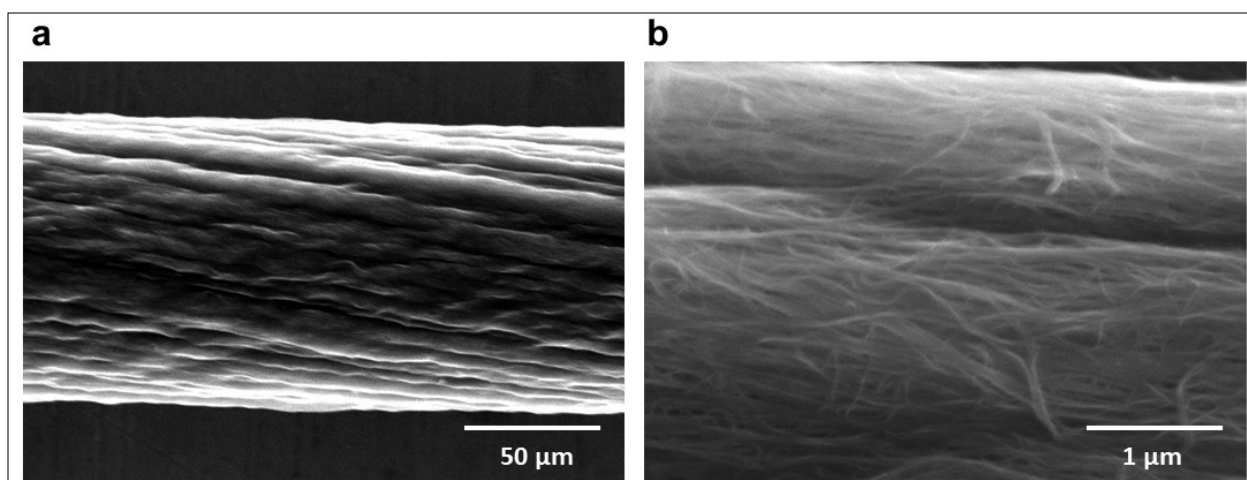

**Fig. S3.** SEM images for the CNTs fiber after electrocatalysis with (a) lower and (b) higher resolution.
